# Supplementary material
Source: PubMed Central journal article supplement (PMC7661286)
Supplement: rspb20201947supp1.pdf [file rspb20201947supp1.pdf]

*McCormick, M.I., Chivers, D.P., Ferrari, M.C.O., Blandford, M.I., Nanninga, G.B., Richardson, C., Fakan, E.P. & Allan, B.J.M. 2020 Microplastic exposure interacts with habitat degradation to affect behaviour and survival of juvenile fish in the field. Proc. R. Soc. B 20201947.*  
<http://dx.doi.org/10.1098/rspb.2020.1947>

## **Supplementary file legend**

**PART 1. Ethical considerations**

**PART 2. Rationale for microplastic concentrations**

**PART 3. Chemical analysis of polystyrene beads**

**PART 4. Ingestion trials**

**PART 5. Egestion trials**

**PART 6. Boldness behavioural assessment**

**PART 7. GLM results on the principle component**

**PART 8. Trends in behavioural measures**

## **Supplementary file**

### **PART 1. Ethical considerations**

Transportation of juvenile fish from light traps to the Lizard Island research station aquarium system occurred in 60-L containers with lids to reduce stress by subduing the ambient light conditions and took 10-20 min. The station aquarium system pumps water straight from the lagoon and is a similar chemistry and temperature to ambient seawater. If the journey from the light traps to the laboratory was greater than ~10 min then seawater was carefully exchanged using a bucket to make sure that oxygen and water temperature were maintained at ambient seawater conditions. Target fishes were carefully removed from the catch by means of hand nets and the bycatch was returned to the reef after being temporarily maintained (< 4 h) in a flow-through seawater system. Focal fish were tagged to identify experimental fish in the field following the protocol detailed in Hoey and McCormick [1]. Briefly, this involved placing fish in a plastic bag of aerated seawater such that the fish could be held still using the bag but still ventilate their gills. This allowed a fluorescent elastomer tattoo to be delivered under the scales using a 27-gauge hypodermic needle, leaving a 1.5-2 mm long stripe of (red) colour. Tagging of this species and developmental stage of damselfish using this method has been shown to not affect growth or mortality [1]

### **PART 2. Rationale for microplastic concentrations**

Obtaining reliable data on the availability of microplastics to animals is very difficult because it not only requires good estimates of the concentrations of microplastics in the different habitats where the target animals may be present, but also requires information on the likelihood of the animal feeding on the particles when available. Currently, estimates of concentrations typically come from surface water or sediment samples. Very few estimates of microplastic concentrations in the waters around tropical coral reefs are available and surprisingly few are available for inshore coastal areas near urban centres of the tropics [2, 3]. Wang et al. [4] used a manta tow plankton net to sample 18 remote open ocean stations across the tropical mid-west Pacific and found very low quantities of microplastics in surface waters (6,028 to 95,335 particles/km<sup>2</sup>;

equivalent to  $\sim 0.015 \times 10^{-3}$  to  $0.24 \times 10^{-3}$  particles/L). Abayomi et al. [5] found higher surface microplastic particle concentrations of  $4.38 \times 10^4$  to  $1.46 \times 10^6$  p/km<sup>2</sup> (equivalent to  $0.1095 \times 10^{-3}$  to  $2.92 \times 10^{-3}$  p/L) in coastal waters of the Arabian Gulf, while sediment samples from beaches revealed concentrations of 1,800 to 11,400 p/m<sup>3</sup>. Surface water samples from in and outside Kingston harbour, Jamaica revealed higher concentrations of up to  $2.7 \times 10^6$  p/km<sup>2</sup> (equivalent to  $5.73 \times 10^{-3}$  p/L). Manalu et al. [6] found extremely high concentrations of microplastics in the coastal sediments of Jakarta Bay, off Indonesia's national capital (range 18,405 to 38,790 p/kg dry sediment). Reisser et al. [7] undertook surface net tows at 4 sampling stations within the Great Barrier Reef, Australia and found plastic concentrations of 956 to 13,518 p/km<sup>2</sup> ( $\sim 5.6 \times 10^{-3}$  to 0.79 / L) (though only floating plastic particles were counted in this study).

More research has been undertaken in non-tropical coastal areas and the microplastic concentrations found tend to be much higher. We believe that this indicative of the lack of sampling around tropical urban areas and waterways rather than necessarily a difference with latitude. For instance, 38,450 and 126,200 /m<sup>3</sup> were the upper ranges of particle concentrations in the sediment of two urban estuaries in South Carolina, USA, with 11 and 88 particles/L in the water column [8]. Sampling of water from the Pearl River and River estuary in China obtained upper ranges of 7.8 and 53.3 p/L respectively [9]. Size analyses showed that 80% of the particles are less than 0.5mm in size in the latter study. Interestingly, a recent paper for an Australian Estuary using towed surface nets found moderate concentrations of water column microplastic particles (0.4 p/ L) in general, but these concentrations increased 43-times after a storm event (17.4 p/L) [10]. It is suggested that such dramatic increases stem from two components: new particles being washed into the system, and the resuspension of existing particles from the sediment. Resuspension of materials within sediments is a common feature on coral reefs [11, 12], and will be of particular importance to dense types of plastic such as polystyrene, which at a specific density of 1.04 g/cm<sup>3</sup> is negatively buoyant [13]. This resuspension of microplastics within the upper layers of the sediment will be particularly important to tropical organisms associated with coral reefs that feed at or close to the bottom. Furthermore, high rainfall and storm events are typical of the tropical regions and research shows that these events can lead to the transport of the discharge from estuaries >50 km offshore and >100 km north on the Great Barrier Reef (GBR) [14] and at least 20km offshore in typical summer conditions [15]. About

65% of the almost 3000 reefs of the GBR are within 50km of the coast, which means that most receive regular inputs of suspended material, some of which will be microplastics.

Currently, what we can say of the concentrations available to fishes in tropical waters is that they are likely to be spatially variable and will pose an increasing threat in the future as the amount of microplastics within the environment increases. Concentrations around tropical South-East Asia are likely to be high given the prevalence of visible plastic in their coastal zone and waterways [16, 17], and the very high concentrations in beach sediment recorded off Jakarta Indonesia by Manalu et al. [6]. Our current study was conducted at Lizard Island (14° 40' S, 145° 28' E), on the northern GBR, Australia. This study site is ideal as it is in a remote part of the GBR with no urbanisation inshore. This means that it is likely that neither the parents of the offspring studied nor the offspring have a history of microplastic consumption. This reduces the confounding influence of exposure history on our results. Given the importance that the parental transfer of pollutant effects can have to offspring characteristics (e.g., [18]) the remote nature of the study site in the present study can be seen as advantageous. To date, no information is available on the concentrations of microplastic particles in specific microhabitats foraged by the focal fish used for the study. Other studies have found that fish can preferentially select and consume microplastics within their environment [19], suggesting that even if microplastics are in relatively low concentrations in the environment, they may be preferentially consumed. The experimental scenario used in the present study may be analogous to the microplastic levels found near inshore fringing reefs and inshore reefs near urban areas within the tropical Indo-Pacific. However, given the current uncertainty of the availability of microplastics to specific organisms in nature, caution must be exercised in the interpretation of the results of our experiments and what they mean for fishes on reefs.

Microbeads of 200-300 µm were used in the current study for a number of reasons. These beads are of a similar size to a newly hatch brine shrimp (*Artemia* spp.), which was also to be used in the experiment. This size also represents the mean size of beads used in many commercial face cleansers (60 - 800 µm, mean 264 µm) [20].

### **PART 3. Chemical analysis of polystyrene beads**

#### **Methods**

Polystyrene microbeads (Polysciences, 200-300  $\mu\text{m}$ ), Polystyrene (Sigma Aldrich, average molecular weight = 192K Daltons) and deuterated water ( $\text{D}_2\text{O}$ ) (Sigma Aldrich, 99.9 atom%) were used as received. Thermal Gravimetric Analysis (TGA) was performed using a TA Instruments SDT 650 instrument at a heating rate of 10  $^\circ\text{C}/\text{min}$  up to 500  $^\circ\text{C}$  under constant flow of nitrogen (50 mL/min). The initial weight of the samples was between 1.88 and 3.98 mg. Infrared spectra of the neat samples were recorded using a Fourier Transform – Infrared Spectrometer (FT-IR) equipped with a SMART iTR attenuated total reflectance attachment. Proton Nuclear Magnetic Resonance ( $^1\text{H}$ -NMR) of the samples were recorded as solutes in  $\text{D}_2\text{O}$  at 298 K on a Bruker 400 MHz NMR spectrometer using standard Bruker pulse sequences. In a glass reaction vial, 1.5 mL of  $\text{D}_2\text{O}$  and  $\sim 15$  microsphere particles were added and left for 24 hours under ambient conditions. A  $^1\text{H}$ -NMR spectrum of the  $\text{D}_2\text{O}$  leachate after exposure to the microsphere particles was obtained, and compared to a pure  $\text{D}_2\text{O}$  spectrum to examine the leachate.

#### **Results**

Figure S1 compares the TGA analysis of the microspheres with pure polystyrene. Both thermograms revealed a single thermal decomposition at 384  $^\circ\text{C}$ , indicating a good match. A small decrease just above 100  $^\circ\text{C}$  in the spheres was attributed to loss of moisture. The FT-IR analysis of the microspheres (Figure S2) were compared with commercially available pure polystyrene. The essentially perfect match of the commercially available polystyrene and the microspheres indicate that the microspheres are pure polystyrene. Figure S3 compares the proton nuclear magnetic resonance (NMR) spectra of pure deuterated water ( $\text{D}_2\text{O}$ ) and the  $\text{D}_2\text{O}$  leachate after exposure of the microspheres for 24 hours. The NMR spectra show no evidence of leaching as both before and after spectra match perfectly.

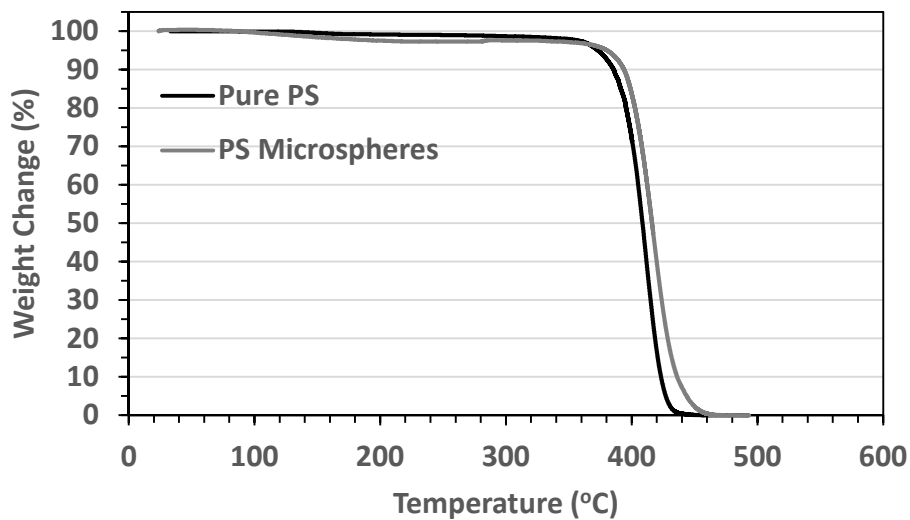

**Figure S1.** Thermal gravimetric analyses of pure polystyrene (solid black) and the polystyrene microspheres (solid grey).

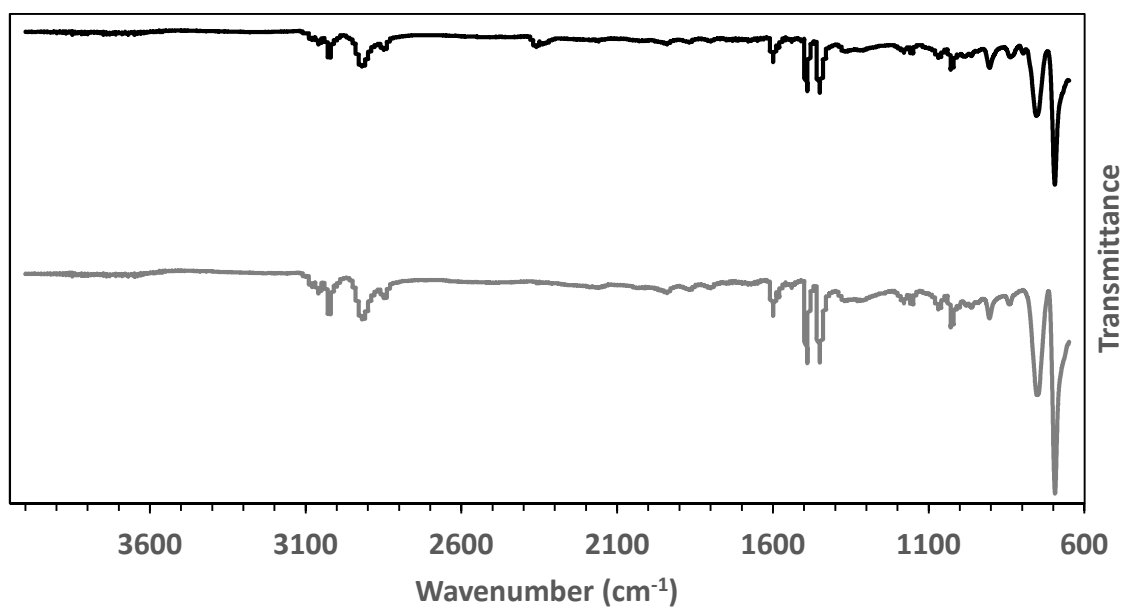

**Figure S2.** The infrared spectra of pure polystyrene (solid black) and the polystyrene microspheres (solid grey).

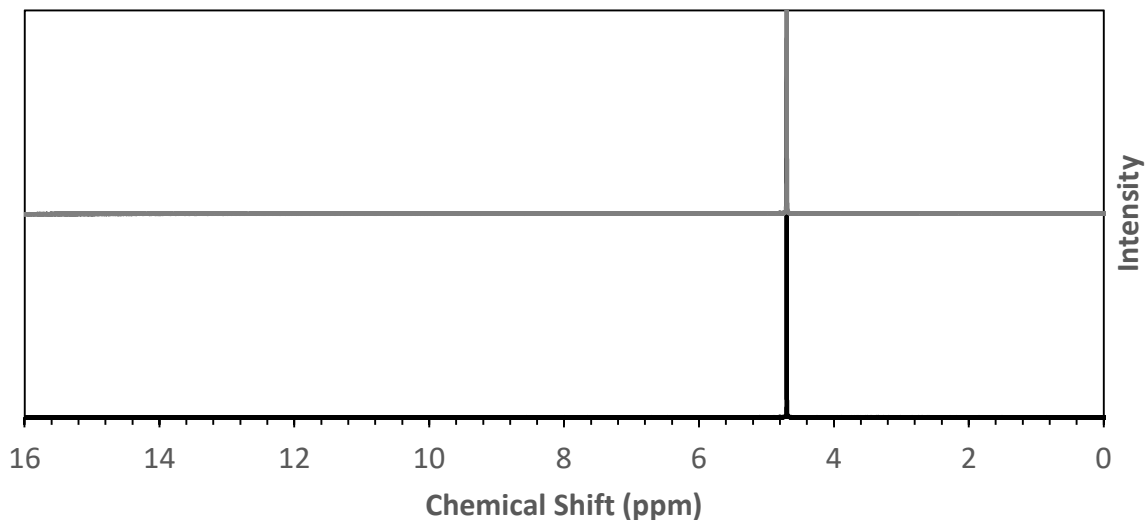

**Figure S3.** The proton nuclear magnetic resonance spectra of pure deuterated water ( $D_2O$ ) and the  $D_2O$  leachate after exposure to polystyrene microspheres for 24 hours.

#### **PART 4. Ingestion trials**

To examine the variability in the consumption of microplastic spheres by *P. amboinensis*, light trap caught fish were starved for a minimum of 6 h, placed into 0.8 L glass beakers in groups of 4 fish and left to acclimate for 1 h. After the acclimation period 40 polystyrene spheres were added (i.e., 50 p/L). An airstone kept the seawater well oxygenated and plastic particles in suspension. Fish were then left undisturbed for 1 h, after which they were immediately euthanized via cold shock. The fish were maintained on ice until dissection, which took place within 12 h of death. The fish were placed under a dissecting microscope (Zeiss Discovery V.8) and their digestive tracks were dissected under 2.5x magnification. Spheres retrieved from the guts were counted by two observers and photographed with an AxioCam ERc5s (Zen Blue Edition 2011 imaging software).

All but 9 out of 60 fish were found to have consumed plastic spheres (85%), with ingestion rates ranging between 1 and 33 particles (Fig. S4) with a mean of 4.5 spheres per fish (median of 1). The distribution was markedly right skewed with 60% of fish eating 3 or fewer spheres (Fig. S4).

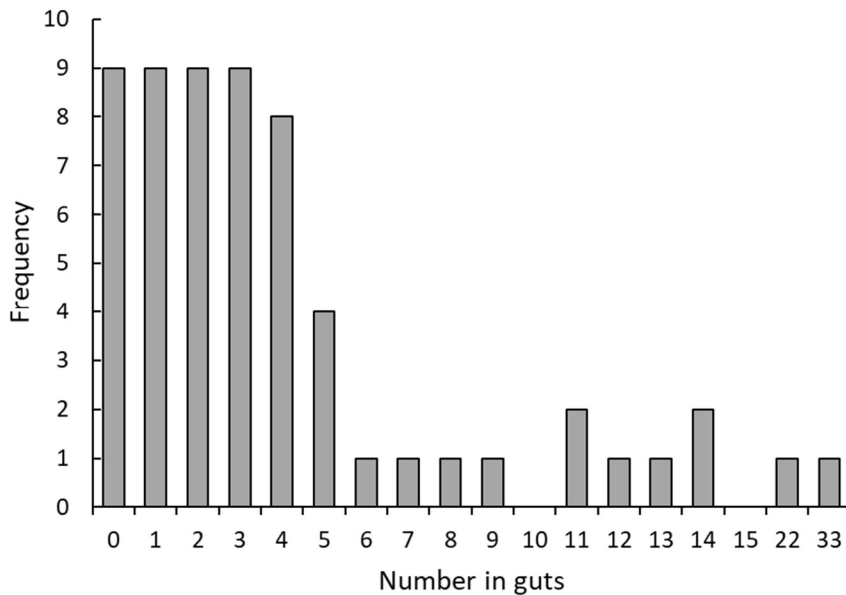

**Figure S4.** Consumption of polystyrene spheres (200-300  $\mu\text{m}$ ) by juvenile *Pomacentrus amboinensis* after a 4 h exposure to 50 particles per litre (n = 60 fish).

### **PART 5. Egestion trials**

To quantify the gut passage time of polystyrene spheres, fish were exposed to a high concentration of plastic spheres and then serially sampled to quantify egestion. Light trap caught *Pomacentrus chrysurus* were used for this study as no *P. amboinensis* were available. These congeners have similar planktonic life-styles as juveniles, so data on microplastics egestion in *P. chrysurus* should inform us on the likely egestion characteristics of *P. amboinensis*. In this experiment, 60 *P. chrysurus* were placed into a 2 L tank of aerated flow-through seawater. After a 1 hour acclimation period, the fish were exposed to ~3000 polystyrene spheres (200-300  $\mu\text{m}$ ) for 1 hour with mild aeration, but without flow-through water. The high concentration of beads was used to simply give all fish the opportunity to feed on microplastics so that we could best quantify their gut through-put rates. After this period, fish were removed and transferred to a clean tank with flow-through seawater. Ten individuals were then removed and euthanized by cold shock at 0 h, 6 h, 8 h, 10 h, 12 h and 14 h. Fish were dissected as above and the number of spheres within the digestive tract was counted.



In keeping with Fig. S4, ingestion of polystyrene spheres (time zero) was highly variable, ranging from none to 51 particles. Serial sampling indicates that *P. chrysurus* can pass the particles through their alimentary tracts, taking up to 14 h to achieve egestion of all particles (Fig. S5).

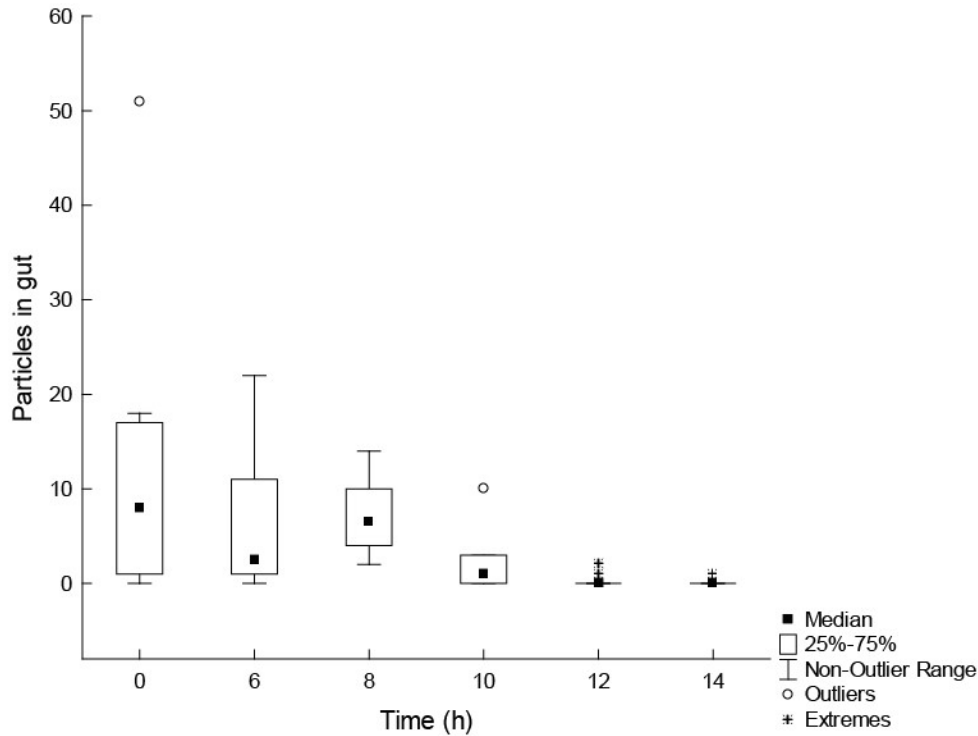

**Figure S5.** Egestion of polystyrene spheres (200-300  $\mu\text{m}$ ) by juvenile *Pomacentrus chrysurus*. Fish were exposed to 3000 particles for 1 hour, then transferred to clean seawater and groups of 10 fish were randomly sampled over a 14 h period.

## PART 6. Boldness behavioural assessment

The boldness score follow methodology used in previous studies on small fishes [21, 22] and was categorized as: 0 if the fish was positioned within a small hole and seldom emerged; 1 if it retreated to a hole when approached by the pencil tip and took more than 5 sec to re-emerge,

with weak or tentative strikes at food; 2 if fish shied to shelter of the patch when approached by the pencil tip, but emerged quickly and purposefully struck at food; and 3 if the fish did not retreat to shelter when approached, but rather explored around the coral patch, and struck aggressively at food [22]. Previous research showed that this boldness measure is repeatable across different time scales (e.g., repeatability values of  $\sim 0.5$  over a 2 h period; [23, 24]). Three-minute behavioural assessments have previously been found to be sufficiently long to obtain a representative estimate of an individual's behaviour [24, 25]. Video cameras could not be used to create a reliable record of these assessments because fish move around their topographically complex habitat patches.

#### **PART 7. GLM results on the principle component.**

**Table S1.** Comparison of the effects of pre-exposure to polystyrene spheres and the habitat on which they were placed (live or dead coral patch) on the behaviour of juvenile *Pomacentrus amboinensis*. Pre-exposure of fish to plastics required fish to be placed in tanks in groups, yielding a nested tank term. Behaviour was analysed as a composite variable, represented as PC1 of a principal component analysis on bite rate, total distance moved in 3 min, maximum distance ventured from shelter and a boldness index (see text). The effect sizes are partial eta squares.

| Source of variation     | df | MS    | F     | p       | Effect size |
|-------------------------|----|-------|-------|---------|-------------|
| Plastic treatment       | 1  | 36.08 | 27.11 | <0.0001 | 0.61        |
| Habitat                 | 1  | 5.67  | 11.17 | 0.004   | 0.41        |
| Plastic * Habitat       | 1  | 6.82  | 13.42 | 0.002   | 0.46        |
| Tank(Plastic)           | 1  | 1.26  | 2.78  | 0.03    | 0.80        |
| Habitat x Tank(Plastic) | 19 | 0.47  | 0.83  | 0.67    | 0.14        |
| Error                   | 93 | 0.57  |       |         |             |

## PART 8. Trends in behavioural measures

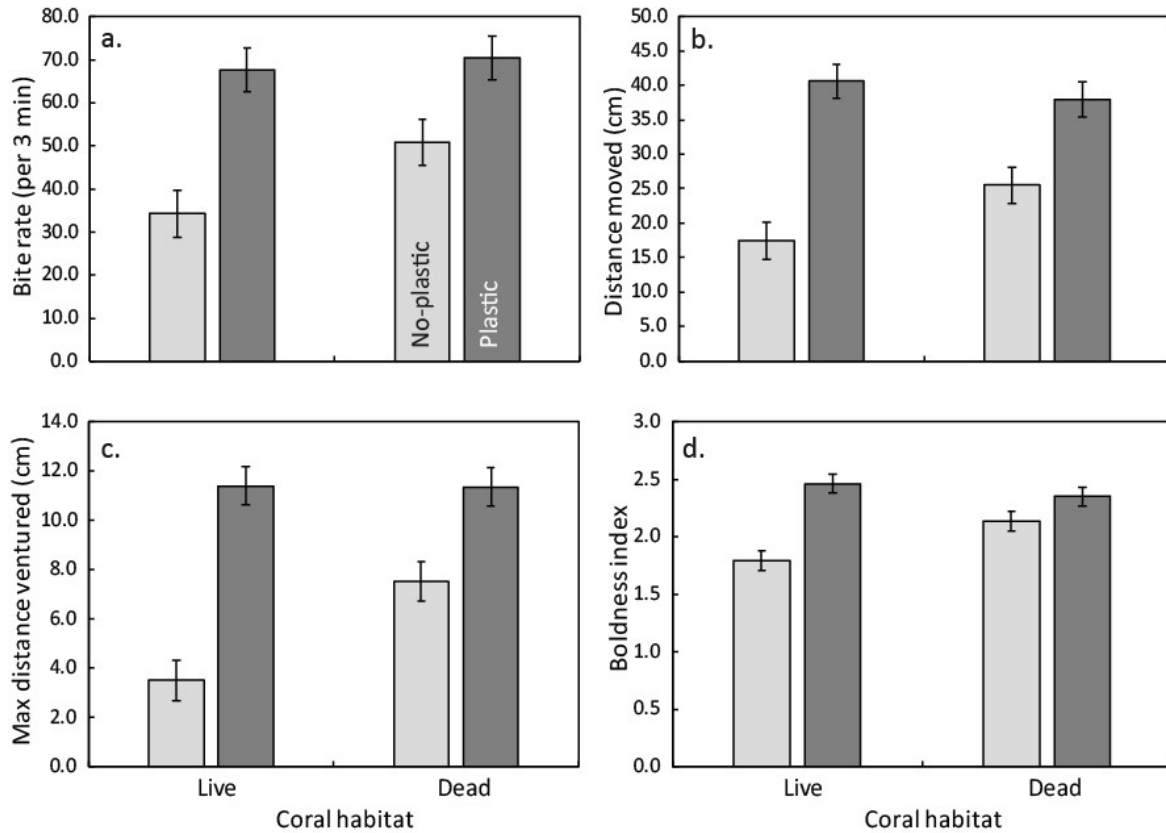

**Figure S6.** Mean (a) number of bites, (b) distance travelled (in cm), (c) maximum distance ventured from shelter (in cm), and (d) boldness (continuous scale from 0 to 3, see text) for juvenile *Pomacentrus amboinensis* observed during a 3-min period. Fish were maintained for 4 days in glass tanks of aerated seawater and fed *Artemia* only (light grey bars) or *Artemia* and microplastics (dark grey bars), and subsequently released in the field and placed in live or dead-degraded coral habitat. Errors are standard errors. N (left to right) = 28, 32, 32, 31.

## References used in the Supplementary file

- [1] Hoey, A.S. & McCormick, M.I. 2006 Effects of subcutaneous fluorescent tags on the growth and survival of a newly settled coral reef fish, *Pomacentrus amboinensis* (Pomacentridae). *Proceedings of the 10th International Coral Reefs Symposium*, 420-425.
- [2] Li, C.R., Busquets, R. & Campos, L.C. 2020 Assessment of microplastics in freshwater systems: A review. *Sci. Total Environ.* **707**, 135578. (doi:10.1016/j.scitotenv.2019.135578).
- [3] Purba, N.P., Handyman, D.I.W., Pribadi, T.D., Syakti, A.D., Pranowo, W.S., Harvey, A. & Ihsan, Y.N. 2019 Marine debris in Indonesia: A review of research and status. *Mar. Pollut. Bull.* **146**, 134-144. (doi:10.1016/j.marpolbul.2019.05.057).
- [4] Wang, S.M., Chen, H.Z., Zhou, X.W., Tian, Y.Q., Lin, C., Wang, W.L., Zhou, K.W., Zhang, Y.B. & Lin, H. 2020 Microplastic abundance, distribution and composition in the mid-west Pacific Ocean. *Environ. Pollut.* **264**, 114125. (doi:10.1016/j.envpol.2020.114125).
- [5] Abayomi, O.A., Range, P., Al-Ghouti, M.A., Obbard, J.P., Almeer, S.H. & Ben-Hamadou, R. 2017 Microplastics in coastal environments of the Arabian Gulf. *Mar. Pollut. Bull.* **124**, 181-188.
- [6] Manalu, A.A., Hariyadi, S. & Wardiatno, Y. 2017 Microplastics abundance in coastal sediments of Jakarta Bay, Indonesia. *Aquaculture, Aquarium, Conservation & Legislation* **10**, 1164-1173.
- [7] Reisser, J., Shaw, J., Wilcox, C., Hardesty, B.D., Proietti, M., Thums, M. & Pattiaratchi, C. 2013 Marine plastic pollution in waters around Australia: characteristics, concentrations, and pathways. *PLoS ONE* **8**, e80466. (doi:10.1371/journal.pone.0080466).
- [8] Gray, A.D., Wertz, H., Leads, R.R. & Weinstein, J.E. 2018 Microplastic in two South Carolina Estuaries: Occurrence, distribution, and composition. *Mar. Pollut. Bull.* **128**, 223-233.
- [9] Yan, M., Nie, H., Xu, K., He, Y., Hu, Y., Huang, Y. & Wang, J. 2019 Microplastic abundance, distribution and composition in the Pearl River along Guangzhou city and Pearl River estuary, China. *Chemosphere* **217**, 879-886.
- [10] Hitchcock, J.N. 2020 Storm events as key moments of microplastic contamination in aquatic ecosystems. *Sci. Total Environ.* **734**, 139436.
- [11] Browne, N.K., Smithers, S.G. & Perry, C.T. 2013 Spatial and temporal variations in turbidity on two inshore turbid reefs on the Great Barrier Reef, Australia. *Coral Reefs* **32**, 195-210. (doi:10.1007/s00338-012-0965-1).
- [12] Dufois, F., Lowe, R.J., Branson, P. & Fearn, P. 2017 Tropical Cyclone-Driven Sediment Dynamics Over the Australian North West Shelf. *J. Geophys. Res.-Oceans* **122**, 10225-10244. (doi:10.1002/2017jc013518).
- [13] Marie-Theres Mueller, Hendrik Fueser, Lam Ngoc Trac, Philipp Mayer, Walter Traunspurger & Höss, S. 2020 Surface-related toxicity of polystyrene beads to nematodes and the role of food availability. *Environ. Sci. Technol.* **54**, 1790-1798.
- [14] Bainbridge, Z.T., Wolanski, E., Alvarez-Romero, J.G., Lewis, S.E. & Brodie, J.E. 2012 Fine sediment and nutrient dynamics related to particle size and floc formation in a Burdekin River flood plume, Australia. *Mar. Pollut. Bull.* **65**, 236-248. (doi:10.1016/j.marpolbul.2012.01.043).
- [15] Wolanski, E., Fabricius, K.E., Cooper, T.F. & Humphrey, C. 2008 Wet season fine sediment dynamics on the inner shelf of the Great Barrier Reef. *Estuarine Coastal and Shelf Science* **77**, 755-762. (doi:10.1016/j.ecss.2007.10.014).
- [16] Esquinas, G.G.M.S., Mantala, A.P., Atilano, M.G., Apugan, R.P. & Galarpe, V.K.R. 2020 Physical characterization of litter and microplastic along the urban coast of Cagayan de Oro in

- Macajalar Bay, Philippines. *Mar. Pollut. Bull.* **154**, 111083. (doi:10.1016/j.marpolbul.2020.111083).
- [17] Cordova, M.R. & Nurhati, I.S. 2019 Major sources and monthly variations in the release of land-derived marine debris from the Greater Jakarta area, Indonesia. *Scientific Reports* **9**, 8. (doi:10.1038/s41598-019-55065-2).
- [18] Zhang, Y.K., Su, G.Y., Li, M., Li, S.Y., Wang, Q.W., Zhu, G.N., Letcher, R.J. & Liu, C.S. 2018 Chemical and biological transfer: Which one is responsible for the maternal transfer toxicity of tris(1,3-dichloro-2-propyl) phosphate in zebrafish? *Environ. Pollut.* **243**, 1376-1382. (doi:10.1016/j.envpol.2018.09.114).
- [19] Nanninga, G.B., Scott, A. & Manica, A. 2020 Microplastic ingestion rates are phenotype-dependent in juvenile anemonefish. *Environ. Pollut.* **259**, 113855. (doi:<https://doi.org/10.1016/j.envpol.2019.113855>).
- [20] Chang, M. 2015 Reducing microplastics from facial exfoliating cleansers in wastewater through treatment versus consumer product decisions. *Mar. Pollut. Bull.* **101**, 330-333.
- [21] McCormick, M.I. 2012 Lethal effects of habitat degradation on fishes through changing competitive advantage. *Proc Roy Soc Lond B* **279**, 3899-3904. (doi:10.1098/rspb.2012.0854).
- [22] McCormick, M.I. 2009 Behaviourally mediated phenotypic selection in a disturbed coral reef environment. *PLoS One* **4**, e7096. (doi:10.1371/journal.pone.0007096).
- [23] White, J.R., Meekan, M.G., McCormick, M.I. & Ferrari, M.C.O. 2013 A comparison of measures of boldness and their relationships to survival in young fish. *PLoS ONE* **8**, 268900. (doi:10.1371/journal.pone.0068900).
- [24] White, J.R., Meekan, M.G. & McCormick, M.I. 2015 Individual consistency in the behaviors of newly-settled reef fish. *PeerJ* **3**, e961. (doi:10.7717/peerj.961).
- [25] McCormick, M.I. & Weaver, C.J. 2012 It pays to be pushy: intracohort interference competition between two reef fishes. *PLoS One* **7**, e42590. (doi:10.1371/journal.pone.0042590).
